# Supplementary material
Source: PubMed Central journal article supplement (PMC4389603)
Supplement: rspb20141984supp1.pdf [file rspb20141984supp1.pdf]

## **Effects of geographic heterogeneity in species interactions on the evolution of venom genes**

Dan Chang<sup>1,2,\$</sup>, Amy M. Olenzek<sup>1</sup>, Thomas F. Duda, Jr<sup>1,3</sup>

1. Department of Ecology and Evolutionary Biology and Museum of Zoology, University of Michigan, Ann Arbor, Michigan, 48109, USA

2. Department of Statistics, University of Michigan, Ann Arbor, Michigan, 48109, USA

3. Smithsonian Tropical Research Institute, Balboa, Ancón, Republic of Panama

\$. Current address: 1156 High Street – Mail Stop EEBiology, University of California Santa Cruz, Santa Cruz, CA 95064

### **Supplementary Information**

**Figure S1-S5**

**Table S1-S10**

**Supplementary references**

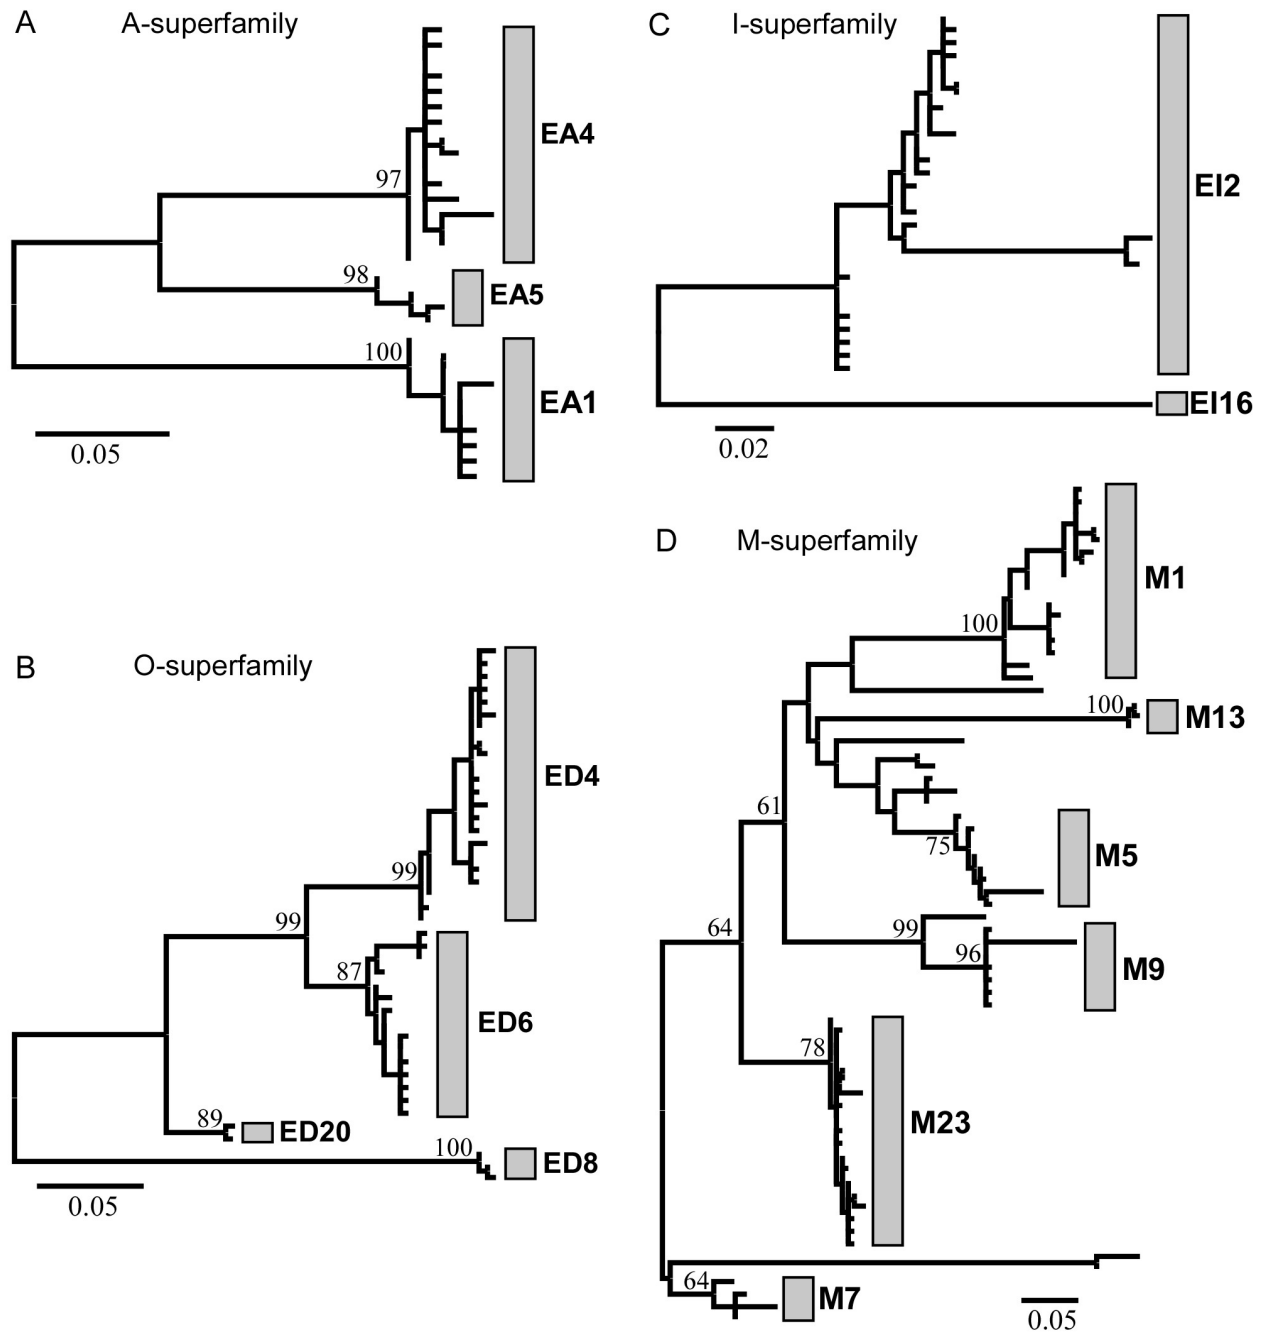

**Figure S1. Gene trees of unique conotoxin gene mRNA sequences recovered from venom ducts of *C. ebraeus* individuals at three locations constructed using the Maximum-Likelihood estimation and mid-point rooting. Major clades labeled with grey bars are of putative single loci, and numbers on internal branches are bootstrap values of major clades (except for I-superfamily).**

(A) Gene tree of 30 A-superfamily sequences recovered from two individuals at American Samoa, three at Guam and two at Hawaii, constructed with the Tajima 3-parameter [1] +G model. These sequences occur in three major clades ('EA1', 'EA4' and 'EA5') that we interpreted to represent three distinct loci. Sequences within clades differed at between one and five nucleotides (nt) (out of a total of 169-185 nt); sequences among clades differed at between 23 and 39 nt (out of a total of 160 nt).

(B) Gene tree of 45 unique O-superfamily sequences obtained from two individuals at American Samoa, five at Guam and two at Hawaii, constructed with the Tamura-Nei [2] +I model. These sequences fell into four major clusters ('ED4', 'ED6', 'ED8' and 'ED20') that we interpreted to represent four distinct loci. Sequences within clades differed at between one and ten nt (out of a total of 266-278 nt); sequences among clades differed at between 21 and 61 nt (out of a total of 266 nt).

(C) Gene tree of 22 unique I-superfamily sequences from two individuals at American Samoa, five at Guam and one at Hawaii, constructed with the HKY [3] model. These sequences are grouped into two major clades ('EI2' and 'EI16'). Sequences within clade EI2 differed at between one and 23 nt (out of a total of 229 nt); sequences between the two clades differed at between 43 and 64 nt (out of a total of 226 nt).

(D) Gene tree of 67 M-superfamily sequences from three individuals at American Samoa, six at Guam and two at Hawaii (amplified with the primer set MPr2 (Table S1)) constructed with the Tamura-Nei+G model. These sequences fell into more than six major clades. Sequences within clades (except clade 'M1') differed at between one and nine nt out of 217-233 nt while sequences among the six clades differed at between 29 and 59 nt out of 214 nt. Sequences of clade 'M1' differ at maximum of 20 nt, indicating the possibility that these sequences represent two loci. Out of the 37 colonies sequenced from two individuals at American Samoa, one at Guam and two at Hawaii, we only recovered seven sequences with the primer set MPr1 (Table S1; GenBank accession numbers JX177162 - JX177168). These sequences differed at a maximum of two nt (out of a total of 233 nt) and represent one putative locus.

| Locus | Allele | Predicted Amino Acid Sequences |   |   |   |   |   |   |   |   |   |   |   |   |   |   |   |   |   |   |   |   |   |   |   |   |   |   |
|-------|--------|--------------------------------|---|---|---|---|---|---|---|---|---|---|---|---|---|---|---|---|---|---|---|---|---|---|---|---|---|---|
| ED4   | ED4a   | K                              | G | C | V | Q | T | G | G | S | C | P | S | T | T | G | C | C | N | G | L | C | N | V | D | K | C | T |
|       | ED4b   | K                              | R | C | V | Q | T | G | G | S | C | P | S | T | T | G | C | C | N | G | L | C | N | V | D | K | C | T |
|       | ED4c   | K                              | R | C | V | Q | T | G | S | S | C | P | S | T | T | G | C | C | S | G | L | C | N | V | N | K | C | T |
|       | ED4d   | K                              | G | C | V | Q | T | G | G | S | C | P | S | T | N | G | C | C | N | G | L | C | N | V | N | R | C | A |
|       | ED4e   | -                              | - | - | - | - | T | G | G | S | C | P | S | T | T | G | C | C | N | G | L | C | N | V | D | K | C | T |
|       | ED4f   | -                              | - | - | - | - | T | G | G | S | C | P | S | T | T | G | C | C | S | G | L | C | N | V | N | K | C | T |
|       | ED4g   | -                              | - | - | - | - | T | G | S | S | C | P | S | T | T | G | C | C | S | G | L | C | N | V | N | K | C | A |
|       | ED4h   | -                              | - | - | - | - | T | G | S | S | C | P | S | T | T | G | C | C | N | G | L | C | N | V | N | K | C | T |
|       | ED4i   | -                              | - | - | - | - | T | G | G | S | C | P | S | T | T | G | C | C | N | G | L | C | N | V | N | K | C | T |
|       | ED6    | ED6a                           | A | C | V | N | R | G | D | P | C | Q | R | T | V | R | C | C | S | R | R | C | G | I | N | G | C |   |
| ED6b  |        | R                              | C | V | N | S | G | D | P | C | Q | R | T | V | R | C | C | S | R | R | C | G | I | N | G | C |   |   |
| ED6c  |        | A                              | C | V | N | R | G | D | P | C | Q | R | T | V | R | C | C | S | R | R | C | S | I | N | G | C |   |   |
| ED6d  |        | A                              | C | V | N | R | G | D | P | C | Q | R | T | V | R | C | C | S | R | R | C | G | V | N | G | C |   |   |
| ED6e  |        | A                              | C | I | N | S | G | D | P | C | Q | R | T | V | R | C | C | S | R | R | C | G | V | N | S | C |   |   |
| ED6f  |        | A                              | C | V | N | R | G | D | P | C | Q | R | T | V | R | C | C | S | R | R | C | G | V | N | S | C |   |   |
| ED6g  |        | -                              | - | - | - | R | G | D | P | C | Q | R | T | V | R | C | C | S | R | R | C | S | I | N | S | C |   |   |
| E1    |        | E1a                            | T | H | S | G | G | A | C | N | S | H | D | Q | C | C | N | A | F | C | D | T | A | T | R | T | C | V |
|       | E1b    | T                              | D | S | G | G | A | C | N | S | H | D | Q | C | C | N | E | F | C | S | T | A | T | R | T | C | I |   |
|       | E1bii  | T                              | D | S | G | G | A | C | N | S | H | D | Q | C | C | N | E | F | C | S | T | A | T | R | T | C | I |   |
|       | E1c    | T                              | R | S | G | G | A | C | Y | S | H | N | Q | C | C | D | D | F | C | S | T | A | T | S | T | C | V |   |
|       | E1d    | T                              | R | S | G | G | A | C | N | S | H | T | Q | C | C | D | D | F | C | S | T | A | T | S | T | C | I |   |
|       | E1e    | T                              | R | S | G | G | A | C | Y | S | H | N | Q | C | C | D | D | F | C | S | T | A | T | S | T | C | I |   |
|       | E1f    | T                              | H | S | G | G | A | C | N | S | H | D | Q | C | C | A | N | F | C | R | K | A | T | S | T | C | M |   |
|       | E1g    | T                              | R | S | G | G | A | C | N | S | H | T | Q | C | C | D | H | F | C | S | T | A | T | S | T | C | I |   |
|       | E1h    | T                              | R | S | G | G | A | C | N | S | H | D | Q | C | C | A | N | F | C | R | K | A | T | S | T | C | M |   |
|       | ED20   | ED20a                          | K | G | E | P | C | N | S | S | V | P | C | C | S | G | I | C | G | Y | F | N | C | A |   |   |   |   |
| ED20b |        | K                              | G | E | P | C | N | W | S | V | P | C | C | S | G | I | C | G | Y | F | N | C | A |   |   |   |   |   |
| ED20c |        | K                              | G | E | P | C | N | S | S | V | P | C | C | S | G | I | * | G | Y | F | N | C | A |   |   |   |   |   |
| EA4   | EA4a   | R                              | I | A | L | I | A | T | R | E | C | C | A | N | P | Q | C | W | A | K | N | C | R |   |   |   |   |   |
|       | EA4b   | R                              | I | A | L | I | A | T | R | E | C | C | A | N | P | Q | C | W | G | K | N | C | R |   |   |   |   |   |

**Figure S2. Alignment of predicted amino acid sequences of alleles of five conotoxin loci of *C. ebraeus*.** The cysteine backbone of each predicted peptide is highlighted in bold; amino acid replacements among alleles are highlighted in grey. \*: stop codon. Because one of the locus-specific primers of locus ED4 could only be designed in the region where this site occurs, we do not have sequence data for all individuals at the first polymorphic site. The nucleotide composition of the first three segregating sites are not known for allele ED6g because the allele-specific primer for locus ED6 (Table S3) occurred in this region and allele ED6g is inferred from the sequence chromatogram obtained with this primer set.

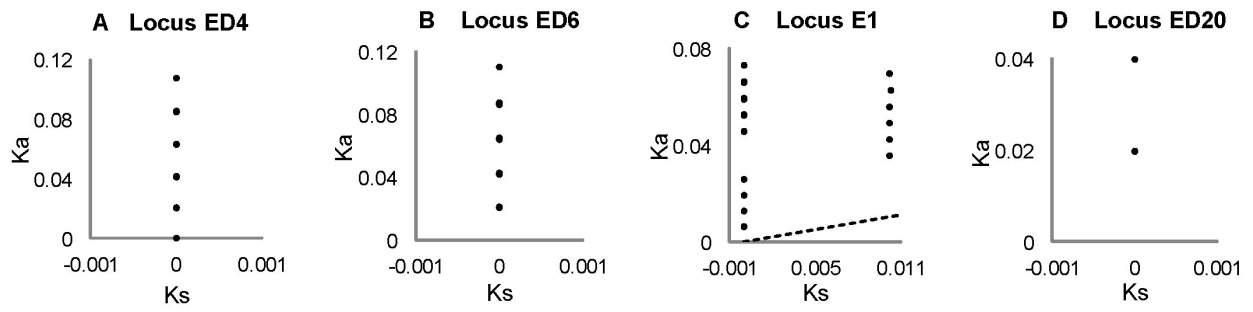

**Figure S3. Pairwise  $K_a$  vs  $K_s$  values estimated based on allelic compositions of four conotoxin loci among populations of *C. ebraeus* at Hawaii, Guam and American Samoa.** The dashed line in (C) has a slope of 1 (i.e.  $K_a=K_s$ ), and all data points in this panel are above the dashed line.  $K_s$  of dots in the other panels are all 0.

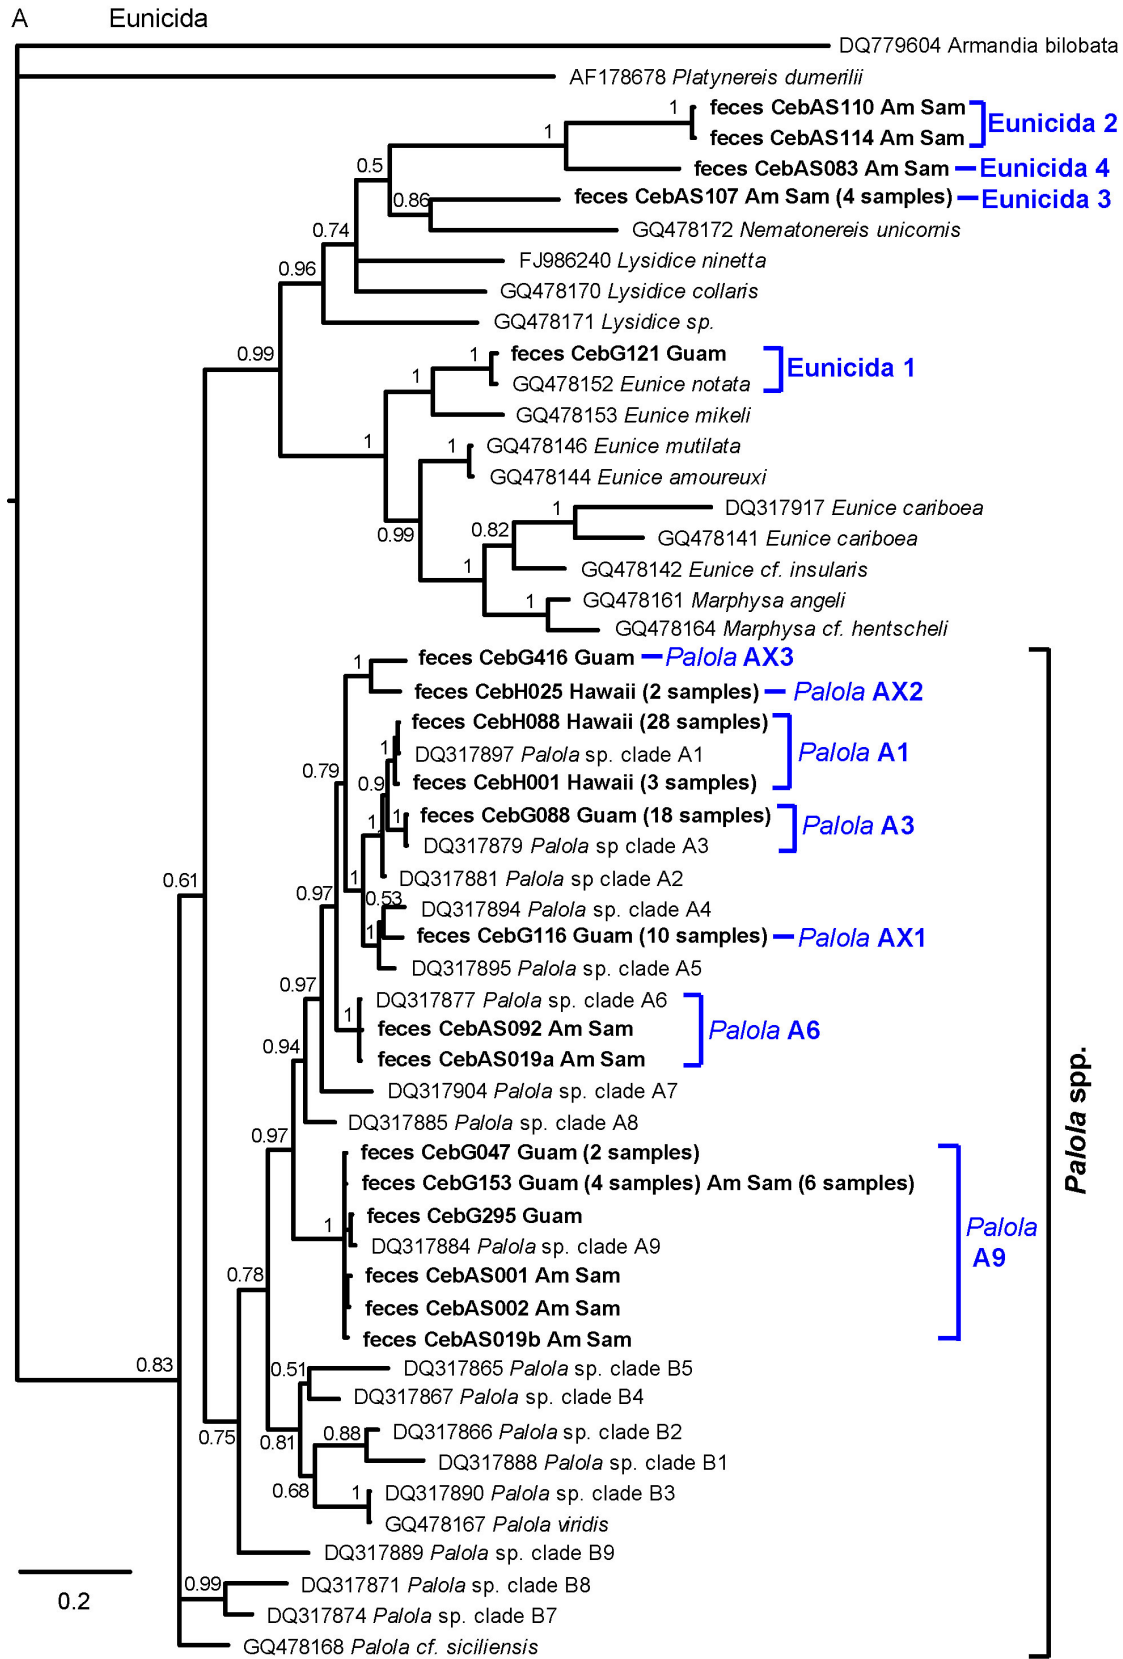

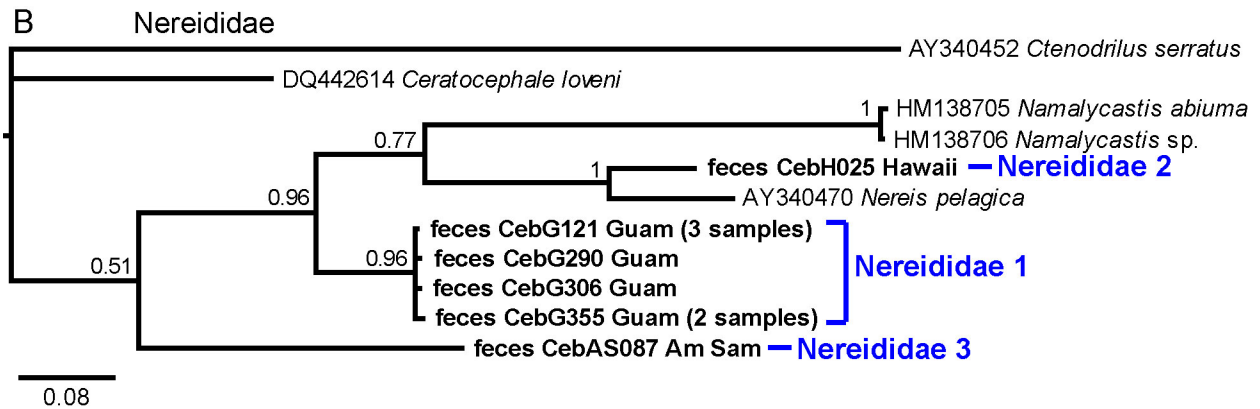

**Figure S4. Bayesian consensus phylogenies constructed from sequences of a region of the mitochondrial 16S gene recovered from fecal samples of *C. ebraeus* individuals at American Samoa, Guam and Hawaii (GenBank accession numbers JX177300-JX177352, FJ804537-FJ804572 and FJ907334-FJ907342) and downloaded from GenBank (GenBank accession numbers included in the names of sequences).**

Posterior probabilities are labeled at nodes of major clades. Sequences obtained from *C. ebraeus* fecal samples are highlighted in bold. Names of fecal sequences include the location and the number of identical samples from each location if identical sequences were obtained from more than one individual. Putative *Palola* species (order Eunicida) were determined based on the individual clades in the species tree and classifications proposed by Schulze [4]. Classification of putative prey species are labeled in blue next to the clades. Am Sam: American Samoa.

(A) Phylogeny of sequences of Eunicida species constructed with the HKY+I+G model, rooted with the outgroup *Armandia bilobata*.

(B) Phylogeny of sequences of Nereididae species constructed with the GTR+G model, rooted with the outgroup *Ctenodrilus serratus*.

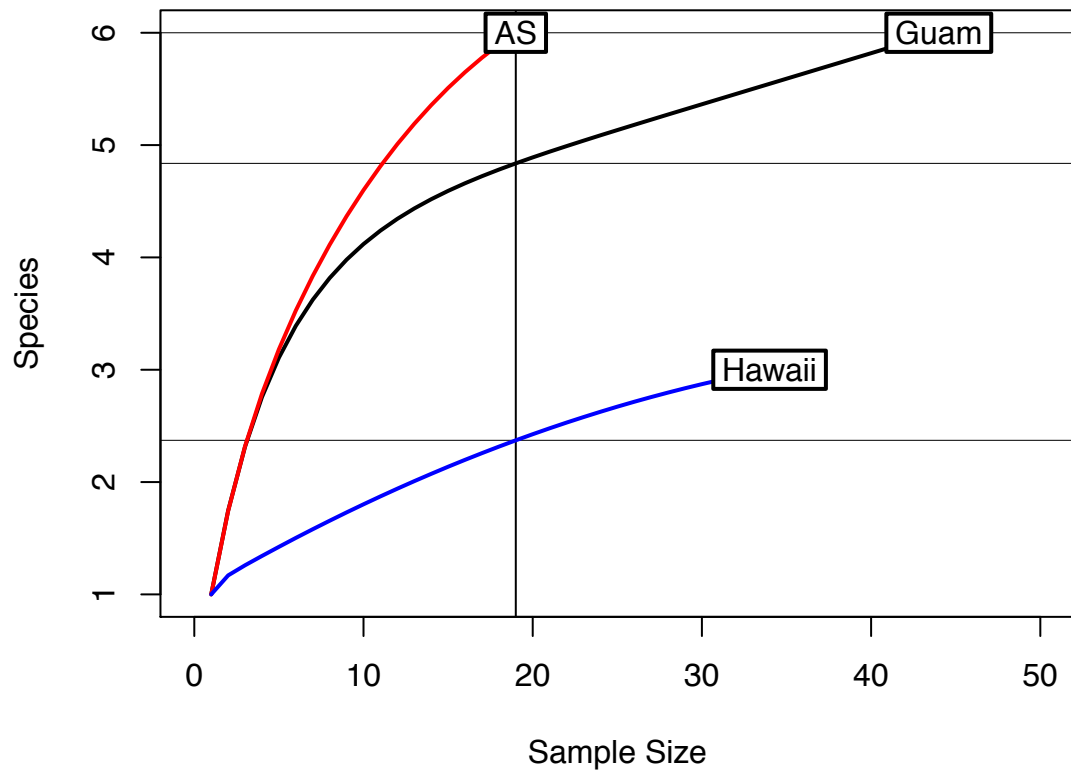

**Figure S5. Rarefaction curves of prey species richness versus sample size for Hawaii, Guam and American Samoa populations.** The vertical line is given to illustrate prey species richness for the populations given the lowest sample size observed (N=19); the horizontal lines project to expected species richness at size 19 for the three populations. AS: American Samoa.



**Table S1. General primers for each conotoxin superfamily. 3'UTR: 3' untranslated region.**

| Conotoxin superfamily      | Toxin type          | Primer location | Primer sequences                 |
|----------------------------|---------------------|-----------------|----------------------------------|
| <b>A</b>                   | $\alpha$ -conotoxin | Prepro          | 5' ATGGGCATGCGGATGATGTTTAC 3'    |
|                            |                     | 3'UTR           | 5' GTCGTGGTTCAGAGGGTCCTGG 3'     |
| <b>O</b>                   | $\delta$ -conotoxin | Prepro          | 5' CATCACCAAGATGAAACTGACGTG 3'   |
|                            |                     | 3'UTR           | 5' GCGCCAATCAAAGATCAAGCC 3'      |
| <b>M</b> (primer set MPr1) | $\mu$ -conotoxin    | Prepro          | 5' CATGATGTCTAAACTGGGAGT 3'      |
|                            |                     | 3'UTR           | 5' GCAAATCTGAAGGAGACTGCAATC 3'   |
| <b>M</b> (primer set MPr2) |                     | Prepro          | 5' GTTGAAAATGGGAGTGGTGCT 3'      |
|                            |                     | 3'UTR           | 5' ATGATATCAACAAACGCTGTCGTTG 3'  |
| <b>I</b>                   | -                   | Prepro          | 5' ATGATGTTTCGATTGACGTCAGTCAG 3' |
|                            |                     | 3'UTR           | 5' ACGTCAGGCTTGAGTTATCTGCC 3'    |

**Table S2. Locus-specific primers used to genotype each locus.**

| Locus       | Location | Primer Sequences                                 |
|-------------|----------|--------------------------------------------------|
| <b>ED4</b>  | Forward  | 5'GTAAAACGACGGCCAGTATTGCACCAGAAAAGATGCGTACAG3'   |
|             | Reverse  | 5'CAGGAAACAGCTATGACCGCGCCAATCAAAGATCAAGCC3'      |
| <b>ED6</b>  | Forward  | 5'GTAAAACGACGGCCAGTAATTGCACCAGAAAAGATGCRATAAAC3' |
|             | Reverse  | 5'CAGGAAACAGCTATGACCGCGCCAATCAAAGATCAAGCC3'      |
| <b>ED20</b> | Forward  | 5'GTAAAACGACGGCCAGTTAAATTGCACGAGAAATCATGCATTAG3' |
|             | Reverse  | 5'CAGGAAACAGCTATGACCGCGCCAATCAAAGATCAAGCC3'      |
| <b>EA4</b>  | Forward  | 5'GTAAAACGACGGCCAGTGATCGCTCTGATCGCCACACGC3'      |
|             | Reverse  | 5'CAGGAAACAGCTATGACCTGGAGTAGCAGCGTCTTCAACG3'     |

**Table S3. Allelic-specific primers to verify and differentiate alleles.**

| Locus      | Location | Primer Sequences                               | Purpose                                                                |
|------------|----------|------------------------------------------------|------------------------------------------------------------------------|
| <b>ED4</b> | Forward  | 5'GTAAAACGACGGCCAGTCATCAGCAAGATGAAACTGAC3'     | differentiate allele 40 from allele 5, verified by sequencing          |
|            | Reverse  | 5'CAGGAAACAGCTATGACCCGATGACACGAACCCCGTC3'      |                                                                        |
| <b>ED6</b> | Forward  | 5'GTAAAACGACGGCCAGTGCACCA GAAAGCATGCGTAAACAG3' | Differentiate 7+39 allele pairs and 6+38 pairs, verified by sequencing |
|            | Reverse  | 5'CAGGAAACAGCTATGACCGCGCC AATCAAAGATCAAGCC3'   |                                                                        |

**Table S4. Results of hierarchical Analysis of Molecular Variance (AMOVA) for the highly polymorphic loci (ED4, ED6 and E1) with the Tamura-Nei [2] model.** Three types of grouping were tested for each locus: H, (G, A) represents grouping of Guam with American Samoa; G, (H, A) represents grouping of Hawaii and American Samoa; A, (H, G) represents grouping of Hawaii and Guam. Significance of  $F_{SC}$ ,  $F_{ST}$  and  $F_{CT}$  values was evaluated by 10,100 random permutations. The negative percentage of covariance among groups may result from the linear restriction of the model and large variations within groups. Results showed that levels of variance among groups for the H, (G, A) grouping is much larger than levels of variance among populations within groups,  $F_{CT}$  is large, and the  $P$ -value is the smallest among the three groupings.

| Locus | Grouping | Variation among groups (%) | Variation among pops within groups (%) | Variation within pops (%) | $F_{SC}$                             | $F_{ST}$                          | $F_{CT}$                              |
|-------|----------|----------------------------|----------------------------------------|---------------------------|--------------------------------------|-----------------------------------|---------------------------------------|
| ED4   | H, (G,A) | 20.20                      | 0.34                                   | 79.46                     | 0.004 <sup><math>P=0</math></sup>    | 0.205 <sup><math>P=0</math></sup> | 0.202 <sup><math>P=0.33</math></sup>  |
|       | G, (H,A) | -1.75                      | 18.58                                  | 83.17                     | 0.183 <sup><math>P=0</math></sup>    | 0.168 <sup><math>P=0</math></sup> | -0.017 <sup><math>P=0.66</math></sup> |
|       | A, (H,G) | -13.45                     | 24.34                                  | 89.11                     | 0.215 <sup><math>P=0</math></sup>    | 0.109 <sup><math>P=0</math></sup> | -0.134 <sup><math>P=1</math></sup>    |
| ED6   | H, (G,A) | 30.98                      | 1.83                                   | 67.19                     | 0.03 <sup><math>P=0</math></sup>     | 0.33 <sup><math>P=0</math></sup>  | 0.31 <sup><math>P=0.34</math></sup>   |
|       | G, (H,A) | -20.90                     | 44.68                                  | 76.22                     | 0.37 <sup><math>P=0</math></sup>     | 0.24 <sup><math>P=0</math></sup>  | -0.21 <sup><math>P=1</math></sup>     |
|       | A, (H,G) | -7.29                      | 32.54                                  | 74.75                     | 0.30 <sup><math>P=0</math></sup>     | 0.25 <sup><math>P=0</math></sup>  | -0.07 <sup><math>P=0.67</math></sup>  |
| E1    | H, (G,A) | 17.53                      | -0.65                                  | 83.12                     | -0.01 <sup><math>P=0.01</math></sup> | 0.17 <sup><math>P=0</math></sup>  | 0.18 <sup><math>P=0.33</math></sup>   |
|       | G, (H,A) | -7.01                      | 18.81                                  | 88.20                     | 0.18 <sup><math>P=0</math></sup>     | 0.12 <sup><math>P=0</math></sup>  | -0.07 <sup><math>P=1</math></sup>     |
|       | A, (H,G) | -5.82                      | 17.32                                  | 88.50                     | 0.16 <sup><math>P=0</math></sup>     | 0.12 <sup><math>P=0</math></sup>  | -0.06 <sup><math>P=0.67</math></sup>  |

**Table S5. Sample sizes, numbers of total (and unique) alleles, gene diversity, nucleotide diversity and their standard errors (SE) of the five conotoxin loci at three locations. AS: American Samoa.**

| <b>Locus</b> | <b>Location</b> | <b>Sample size</b> | <b>Alleles (unique)</b> | <b>Gene Diversity (SE)</b> | <b>Nucleotide Diversity (SE)</b> |
|--------------|-----------------|--------------------|-------------------------|----------------------------|----------------------------------|
| <b>ED4</b>   | <b>AS</b>       | 10                 | 6 (0)                   | 0.632 (0.113)              | 0.017 (0.010)                    |
|              | <b>Guam</b>     | 24                 | 8 (3)                   | 0.714 (0.041)              | 0.028 (0.017)                    |
|              | <b>Hawaii</b>   | 28                 | 4 (0)                   | 0.201 (0.070)              | 0.005 (0.004)                    |
| <b>ED6</b>   | <b>AS</b>       | 13                 | 5 (0)                   | 0.785 (0.041)              | 0.053 (0.030)                    |
|              | <b>Guam</b>     | 24                 | 6 (1)                   | 0.638 (0.064)              | 0.041 (0.024)                    |
|              | <b>Hawaii</b>   | 30                 | 3 (1)                   | 0.242 (0.070)              | 0.011 (0.009)                    |
| <b>E1</b>    | <b>AS</b>       | 21                 | 7 (1)                   | 0.678 (0.064)              | 0.025 (0.014)                    |
|              | <b>Guam</b>     | 29                 | 6 (0)                   | 0.682 (0.041)              | 0.023 (0.013)                    |
|              | <b>Hawaii</b>   | 48                 | 4 (2)                   | 0.620 (0.031)              | 0.022 (0.012)                    |
| <b>ED20</b>  | <b>AS</b>       | 11                 | 2 (1)                   | 0.091 (0.081)              | 0.001 (0.002)                    |
|              | <b>Guam</b>     | 25                 | 2 (0)                   | 0.040 (0.038)              | 0.001 (0.002)                    |
|              | <b>Hawaii</b>   | 20                 | 2 (0)                   | 0.050 (0.047)              | 0.001 (0.002)                    |
| <b>EA4</b>   | <b>AS</b>       | 14                 | 2 (0)                   | 0.198 (0.092)              | 0.004 (0.004)                    |
|              | <b>Guam</b>     | 36                 | 2 (0)                   | 0.178 (0.056)              | 0.003 (0.004)                    |
|              | <b>Hawaii</b>   | 15                 | 2 (0)                   | 0.186 (0.088)              | 0.004 (0.004)                    |

**Table S6. Posterior probabilities of the number of populations (K), assuming a uniform prior of K=2, 3, and 4.** Log probabilities of the data given K (i.e.  $\log(P(\text{data}|\text{K}))$ ) were estimated with Structure 2.3.3.

| <b>K</b>   | <b><math>\log(P(\text{data} \text{K}))</math></b> | <b>Posterior Probability</b> |
|------------|---------------------------------------------------|------------------------------|
| <b>K=2</b> | -332.3                                            | 1.0                          |
| <b>K=3</b> | -352.4                                            | 0.0                          |
| <b>K=4</b> | -367.7                                            | 0.0                          |

**Table S7. Tests of neutrality of conotoxin loci with Tajima's *D*.** Tajima's *D* values were estimated for each locus in each location and *P*-values were estimated by percentages of values in 10,000 simulations that were larger than or equal to observed values. \*:  $P < 0.05$ , \*\*:  $P < 0.001$ . *D* values highlighted in bold are significantly different from zero after the strict Bonferroni correction for multiple tests.

| <b>Locus</b> | <b>Population</b> | <b>Tajima's <i>D</i></b> |
|--------------|-------------------|--------------------------|
| <b>ED4</b>   | AS                | 0.466                    |
|              | Guam              | <b>2.205*</b>            |
|              | Hawaii            | -1.649*                  |
| <b>ED6</b>   | AS                | 1.805*                   |
|              | Guam              | 1.108                    |
|              | Hawaii            | -0.187                   |
| <b>E1</b>    | AS                | 0.837                    |
|              | Guam              | 0.842                    |
|              | Hawaii            | <b>3.216**</b>           |
| <b>ED20</b>  | AS                | -1.162                   |
|              | Guam              | -1.103*                  |
|              | Hawaii            | -1.124*                  |
| <b>EA4</b>   | AS                | -0.477                   |
|              | Guam              | -0.225                   |
|              | Hawaii            | -0.537                   |

**Table S8. Coefficients of the slope of the fitted line in simple regression analyses of the haplotype and nucleotide diversities of five conotoxin genes and the COI gene with the diversities of prey ( $H'$  and genetic distance).** Haplotype diversities of the mitochondrial COI gene for populations at Hawaii, Guam and American Samoa are nearly equivalent (0.963 at Hawaii, 0.978 at Guam, 0.947 at American Samoa; retrieved from Duda and Lessios [5]). The Guam population exhibits slightly higher nucleotide diversity (0.009 at Guam, 0.006 at American Samoa and Hawaii; estimated with Tamura-Nei model from the COI gene sequences reported in Duda and Lessios [5]).

| Locus       | Haplotype diversity vs $H'$ | Haplotype diversity vs genetic distance | Nucleotide diversity vs $H'$ | Nucleotide diversity vs genetic distance |
|-------------|-----------------------------|-----------------------------------------|------------------------------|------------------------------------------|
| <b>ED4</b>  | 0.423                       | 2.597                                   | 0.016                        | 0.079                                    |
| <b>ED6</b>  | 0.422                       | 3.069                                   | 0.032                        | 0.237                                    |
| <b>E1</b>   | 0.054                       | 0.344                                   | 0.001                        | 0.016                                    |
| <b>ED20</b> | 0.014                       | 0.199                                   | 0                            | 0                                        |
| <b>EA4</b>  | 0.002                       | 0.054                                   | 0                            | -0.001                                   |
| <b>COI</b>  | -0.001                      | -0.069                                  | 0.001                        | 0.002                                    |

**Table S9. Pearson [6], Spearman [7] and Kendall [8] correlation coefficients of the pairwise  $\Phi_{ST}$  matrices of each of the three highly polymorphic conotoxin genes with the pairwise divergence indices of prey ( $PS_I$  and  $D_{ST}$ ).** Coefficients of  $\Phi_{ST}$  with Pianka's overlap index are identical to those with  $PS_I$ .

| Locus      | $PS_I$  |          |         | $D_{ST}$ |          |         |
|------------|---------|----------|---------|----------|----------|---------|
|            | Pearson | Spearman | Kendall | Pearson  | Spearman | Kendall |
| <b>ED4</b> | -0.999  | -0.866   | -0.817  | 0.727    | 1.000    | 1.000   |
| <b>ED6</b> | -0.985  | -0.866   | -0.817  | 0.746    | 1.000    | 1.000   |
| <b>E1</b>  | -0.999  | -0.866   | -0.817  | 0.655    | 1.000    | 1.000   |

**Table S10. Gene and nucleotide diversities of two O-superfamily conotoxin genes *MIL2* and *MIL3* and the mitochondrial COI gene of *C. miliaris* populations at Easter Island (abbreviated as EI), Guam and American Samoa (abbreviated ‘AS’). Standard deviations of indices are presented in parentheses. Distances among haplotypes are calculated with respective models used in Duda and Lee [9]: K80 [10] model for locus *MIL2*, Jukes-Cantor [11] model for locus *MIL3*, and Tamura-Nei model for the COI gene.**

| Locus       | Gene Diversity<br>(Standard Deviation) |                  |                  | Nucleotide Diversity<br>(Standard Deviation) |                  |                  |
|-------------|----------------------------------------|------------------|------------------|----------------------------------------------|------------------|------------------|
|             | EI                                     | Guam             | AS               | EI                                           | Guam             | AS               |
| <i>MIL2</i> | 0.635<br>(0.043)                       | 0.271<br>(0.084) | 0.381<br>(0.094) | 0.015<br>(0.009)                             | 0.010<br>(0.007) | 0.014<br>(0.009) |
| <i>MIL3</i> | 0.747<br>(0.036)                       | 0.594<br>(0.070) | 0.631<br>(0.064) | 0.021<br>(0.001)                             | 0.017<br>(0.002) | 0.017<br>(0.001) |
| COI         | 0.961<br>(0.014)                       | 1.000<br>(0.017) | 0.979<br>(0.016) | 0.008<br>(0.004)                             | 0.010<br>(0.005) | 0.010<br>(0.005) |

## References

1. Tamura K. 1992 Estimation of the number of nucleotide substitutions when there are strong transition-transversion and G + C-content biases. *Mol Biol Evol* **9**, 678-687.
2. Tamura K., Nei M. 1993 Estimation of the number of nucleotide substitutions in the control region of mitochondrial DNA in humans and chimpanzees. *Mol Biol Evol* **10**, 512-526.
3. Hasegawa M., Kishino H., Yano T. 1985 Dating of the human-ape splitting by a molecular clock of mitochondrial DNA. *J Mol Evol* **22**, 160-174.
4. Schulze A. 2006 Phylogeny and Genetic Diversity of Palolo Worms (Palola, Eunicidae) from the Tropical North Pacific and the Caribbean. *Biol Bull* **210**(1), 25-37.
5. Duda T.F., Lessios H.A. 2009 Connectivity of populations within and between major biogeographic regions of the tropical Pacific in *Conus ebraeus*, a widespread marine gastropod. *Coral Reefs* **28**(3), 651-659.
6. Rodgers J.L., Nicewander W.A. 1988 Thirteen Ways to Look at the Correlation Coefficient. *Am Stat* **42**(1), 59-66.
7. Spearman C. 1910 Correlation calculated from faulty data. *Brit J Psychol, 1904-1920* **3**(3), 271-295.
8. Kendall M.G. 1948 *Rank correlation methods*. Oxford, England, Griffin.
9. Duda T.F., Lee T. 2009 Ecological release and venom evolution of a predatory marine snail at Easter Island. *PLoS One* **4**(5), e5558.
10. Kimura M. 1980 A simple method for estimating evolutionary rates of base substitutions through comparative studies of nucleotide sequences. *J Mol Evol* **16**(2), 111-120.
11. Jukes T.H., Cantor C.R. 1969 Evolution of protein molecules. In *Mammalian protein metabolism* (ed. Munro H.N.), pp. 21-123. New York, Academic Press.
